# Supplementary material for: Tidal variability of nutrients in a coastal coral reef system influenced by groundwater
Source: Copernicus journal article supplement (doi:10.5194/bg-15-997-2018), 2018-02-20
Supplement: Supplementary file 1 [file bg-15-997-2018-supplement.pdf]

Supplement of Biogeosciences, 15, 997–1009, 2018  
<https://doi.org/10.5194/bg-15-997-2018-supplement>  
© Author(s) 2018. This work is distributed under  
the Creative Commons Attribution 3.0 License.

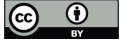

*Supplement of*

## **Tidal variability of nutrients in a coastal coral reef system influenced by groundwater**

**Guizhi Wang et al.**

*Correspondence to:* Guizhi Wang (gzhwang@xmu.edu.cn)

The copyright of individual parts of the supplement might differ from the CC BY 3.0 License.

Table S1. Data collected in the time-series investigation at the coral reef Station CT (latitude: 18.2124; longitude: 109.4744) in Sanya Bay in February 6-13, 2012.

| Sampling time<br>yyyy-mm-dd | Depth<br>m | Salinity | Nutrients |         |           |          |                             | NO <sub>x</sub> | <sup>228</sup> Ra | <sup>228</sup> Ra<br>dpm 100L <sup>-1</sup> |
|-----------------------------|------------|----------|-----------|---------|-----------|----------|-----------------------------|-----------------|-------------------|---------------------------------------------|
|                             |            |          | Nitrite   | Nitrate | Phosphate | Silicate | Sampling time<br>yyyy-mm-dd |                 |                   |                                             |
| 2012/2/6 15:13              | 1.2611     | 33.6196  | 0.247     | 0.547   | 0.132     | 5.904    | 0.794                       | 2/6/2012 15:16  | 27.75             |                                             |
| 2012/2/6 17:58              | 1.6264     | 33.6140  | 0.347     | 1.373   | 0.217     | 6.056    | 1.720                       | 2/6/2012 18:10  | 29.77             |                                             |
| 2012/2/6 21:00              | 2.0078     | 33.6518  | 0.354     | 0.673   | 0.130     | 5.871    | 1.027                       | 2/6/2012 21:02  | 26.26             |                                             |
| 2012/2/7 0:00               | 1.7891     | 33.6462  | 0.349     | 0.611   | 0.110     | 5.934    | 0.960                       | 2/6/2012 23:55  | 27.02             |                                             |
| 2012/2/7 3:00               | 1.1051     | 33.5975  | 0.235     | 0.642   | 0.148     | 5.777    | 0.877                       | 2/7/2012 3:02   | 26.27             |                                             |
| 2012/2/7 6:02               | 0.7047     | 33.5035  | 0.107     | 0.880   | 0.181     | 5.113    | 0.987                       | 2/7/2012 6:04   | 35.23             |                                             |
| 2012/2/7 8:00               | 0.8203     | 33.4686  | 0.124     | 0.958   | 0.181     | 5.564    | 1.082                       | 2/7/2012 8:02   | 38.74             |                                             |
| 2012/2/7 10:00              | 1.0194     | 33.4998  | 0.191     | 1.202   | 0.204     | 6.338    | 1.393                       | 2/7/2012 10:00  | 36.31             |                                             |
| 2012/2/7 12:02              | 1.1363     | 33.5670  | 0.227     | 1.440   | 0.194     | 6.375    | 1.667                       | 2/7/2012 12:04  | 33.28             |                                             |
| 2012/2/7 14:00              | 1.1286     | 33.5935  | 0.194     | 1.071   | 0.186     | 7.019    | 1.265                       | 2/7/2012 14:02  | 41.35             |                                             |
| 2012/2/7 15:57              | 1.1476     | 33.6225  | 0.162     | 0.972   | 0.219     | 6.842    | 1.134                       | 2/7/2012 16:00  | 22.96             |                                             |
| 2012/2/7 18:00              | 1.4370     | 33.6254  | 0.158     | 1.912   | 0.160     | 5.888    | 2.070                       | 2/7/2012 18:05  | 13.98             |                                             |
| 2012/2/7 20:00              | 1.8260     | 33.6531  | 0.266     | 0.370   | 0.110     | 6.174    | 0.636                       | 2/7/2012 20:02  | 16.90             |                                             |
| 2012/2/7 22:00              | 2.0721     | 33.6352  | 0.248     | 0.447   | 0.100     | 5.894    | 0.695                       | 2/7/2012 22:02  | 26.01             |                                             |
| 2012/2/8 0:00               | 1.9841     | 33.6315  | 0.245     | 0.449   | 0.107     | 5.839    | 0.694                       | 2/8/2012 0:02   | 26.29             |                                             |
| 2012/2/8 2:00               | 1.5808     | 33.6316  | 0.282     | 0.500   | 0.124     | 6.122    | 0.782                       | 2/8/2012 2:06   | 31.68             |                                             |
| 2012/2/8 4:05               | 1.0926     | 33.6060  | 0.264     | 0.912   | 0.135     | 5.616    | 1.176                       | 2/8/2012 4:04   | 29.67             |                                             |
| 2012/2/8 5:58               | 0.8167     | 33.6261  | 0.155     | 0.744   | 0.168     | 5.207    | 0.899                       | 2/8/2012 6:02   | 39.86             |                                             |
| 2012/2/8 9:00               | 1.0519     | 33.4924  | 0.175     | 1.342   | 0.196     | 7.135    | 1.517                       | 2/8/2012 9:00   | 45.28             |                                             |
| 2012/2/8 12:00              | 1.3462     | 33.6360  | 0.199     | 0.830   | 0.139     | 6.882    | 1.029                       | 2/8/2012 12:01  | 33.78             |                                             |
| 2012/2/8 15:00              | 1.2829     | 33.6140  | 0.163     | 0.774   | 0.196     | 6.094    | 0.937                       | 2/8/2012 14:58  | 35.32             |                                             |
| 2012/2/8 18:00              | 1.4010     | 33.6252  | 0.406     | 1.010   | 0.189     | 5.424    | 1.416                       | 2/8/2012 18:02  | 29.62             |                                             |
| 2012/2/8 21:05              | 1.9859     | 33.6703  | 0.583     | 0.710   | 0.135     | 4.898    | 1.293                       | 2/8/2012 21:02  | 25.60             |                                             |
| 2012/2/9 0:00               | 2.1465     | 33.6601  | 0.623     | 0.682   | 0.133     | 5.485    | 1.305                       | 2/9/2012 0:02   | 32.32             |                                             |
| 2012/2/9 3:00               | 1.6791     | 33.5696  | 0.615     | 0.806   | 0.139     | 5.110    | 1.421                       | 2/9/2012 3:02   | 27.23             |                                             |
| 2012/2/9 6:00               | 1.0887     | 33.5802  | 0.363     | 0.980   | 0.162     | 4.678    | 1.343                       | 2/9/2012 6:02   | 27.21             |                                             |
| 2012/2/9 9:00               | 1.2258     | 33.5719  | 0.320     | 1.121   | 0.170     | 4.988    | 1.441                       | 2/9/2012 9:02   | 29.05             |                                             |
| 2012/2/9 12:00              | 1.5989     | 33.4511  | 0.321     | 1.083   | 0.159     | 7.251    | 1.404                       | 2/9/2012 12:02  | 38.82             |                                             |
| 2012/2/9 15:02              | 1.4530     | 33.5975  | 0.367     | 0.957   | 0.152     | 5.462    | 1.324                       | 2/9/2012 15:02  | 27.94             |                                             |
| 2012/2/9 18:04              | 1.3926     | 33.5891  | 0.405     | 1.088   | 0.170     | 5.248    | 1.493                       | 2/9/2012 18:02  | 29.28             |                                             |
| 2012/2/9 21:00              | 1.8400     | 33.5708  | 0.541     | 1.069   | 0.146     | 4.588    | 1.610                       | 2/9/2012 21:02  | 25.63             |                                             |
| 2012/2/10 0:00              | 2.0494     | 33.6463  | 0.712     | 0.803   | 0.133     | 4.570    | 1.515                       | 2/10/2012 0:02  | 24.32             |                                             |
| 2012/2/10 3:00              | 1.6602     | 33.6536  | 0.741     | 0.837   | 0.129     | 5.205    | 1.578                       | 2/10/2012 3:04  | 23.71             |                                             |
| 2012/2/10 6:08              | 1.0035     | 33.6482  | 0.563     | 0.980   | 0.140     | 4.740    | 1.543                       | 2/10/2012 6:06  | 25.62             |                                             |
| 2012/2/10 9:05              | 1.1413     | 33.6369  | 0.420     | 1.026   | 0.146     | 5.047    | 1.446                       | 2/10/2012 9:06  | 25.31             |                                             |
| 2012/2/10 12:00             | 1.5075     | 33.6310  | 0.488     | 0.927   | 0.141     | 5.043    | 1.415                       | 2/10/2012 12:02 | 27.62             |                                             |
| 2012/2/10 15:00             | 1.3977     | 33.6449  | 0.623     | 0.911   | 0.149     | 5.282    | 1.534                       | 2/10/2012 15:02 | 25.97             |                                             |
| 2012/2/10 18:05             | 1.1377     | 33.6474  | 0.396     | 1.162   | 0.164     | 4.553    | 1.558                       | 2/10/2012 18:10 | 23.99             |                                             |
| 2012/2/10 21:10             | 1.4732     | 33.6469  | 0.445     | 1.317   | 0.178     | 4.699    | 1.762                       | 2/10/2012 21:12 | 24.69             |                                             |
| 2012/2/11 0:05              | 1.8800     | 33.6472  | 0.546     | 0.942   | 0.142     | 5.589    | 1.488                       | 2/11/2012 0:05  | 29.02             |                                             |
| 2012/2/11 3:11              | 1.7242     | 33.6495  | 0.616     | 0.711   | 0.106     | 4.537    | 1.327                       | 2/11/2012 3:12  | 23.88             |                                             |
| 2012/2/11 6:02              | 1.2086     | 33.6398  | 0.516     | 0.787   | 0.117     | 4.521    | 1.303                       | 2/11/2012 6:03  | 22.84             |                                             |
| 2012/2/11 9:05              | 1.1170     | 33.5976  | 0.364     | 0.948   | 0.129     | 4.500    | 1.312                       | 2/11/2012 9:08  | 25.75             |                                             |
| 2012/2/11 12:10             | 1.5433     | 33.5954  | 0.381     | 0.867   | 0.129     | 4.731    | 1.248                       | 2/11/2012 12:02 | 27.36             |                                             |
| 2012/2/11 15:03             | 1.5057     | 33.5913  | 0.477     | 0.787   | 0.128     | 5.330    | 1.264                       | 2/11/2012 15:03 | 25.50             |                                             |
| 2012/2/11 18:00             | 1.1649     | 33.6216  | 0.319     | 0.928   | 0.132     | 4.511    | 1.247                       | 2/11/2012 18:02 | 31.28             |                                             |
| 2012/2/11 20:00             | 1.1295     | 33.6162  | 0.275     | 1.061   | 0.130     | 4.021    | 1.336                       | 2/11/2012 22:03 | 29.07             |                                             |
| 2012/2/11 22:00             | 1.4023     | 33.5713  | 0.425     | 1.031   | 0.153     | 5.305    | 1.456                       | 2/12/2012 0:02  | 27.12             |                                             |
| 2012/2/12 0:00              | 1.7078     | 33.6247  | 0.573     | 0.754   | 0.125     | 4.921    | 1.327                       | 2/12/2012 2:02  | 24.14             |                                             |
| 2012/2/12 2:00              | 1.8072     | 33.6619  | 0.542     | 0.555   | 0.103     | 4.345    | 1.097                       | 2/12/2012 4:02  | 24.95             |                                             |
| 2012/2/12 4:00              | 1.6096     | 33.6592  | 0.573     | 0.526   | 0.100     | 4.981    | 1.099                       | 2/12/2012 6:02  | 26.16             |                                             |
| 2012/2/12 7:58              | 1.1778     | 33.6535  | 0.366     | 0.635   | 0.102     | 4.592    | 1.001                       | 2/12/2012 7:58  | 22.51             |                                             |
| 2012/2/12 10:00             | 1.3227     | 33.6353  | 0.260     | 0.439   | 0.102     | 4.174    | 0.699                       | 2/12/2012 10:02 | 22.17             |                                             |
| 2012/2/12 12:00             | 1.6063     | 33.6231  | 0.255     | 0.394   | 0.096     | 4.434    | 0.649                       | 2/12/2012 12:03 | 26.86             |                                             |
| 2012/2/12 13:58             | 1.8009     | 33.6299  | 0.262     | 0.369   | 0.092     | 4.134    | 0.631                       | 2/12/2012 13:59 | 26.02             |                                             |
| 2012/2/12 16:00             | 1.6299     | 33.6300  | 0.228     | 0.272   | 0.084     | 3.954    | 0.500                       | 2/12/2012 16:02 | 25.04             |                                             |
| 2012/2/12 18:00             | 1.3690     | 33.6389  | 0.197     | 0.303   | 0.086     | 4.009    | 0.500                       | 2/12/2012 18:00 | 24.66             |                                             |
| 2012/2/12 20:03             | 1.1454     | 33.6365  | 0.118     | 0.396   | 0.101     | 3.133    | 0.514                       | 2/12/2012 20:02 | 29.72             |                                             |
| 2012/2/12 22:00             | 1.2353     | 33.6301  | 0.123     | 0.406   | 0.104     | 2.894    | 0.529                       | 2/12/2012 22:02 | 32.72             |                                             |
| 2012/2/13 0:00              | 1.4703     | 33.5742  | 0.403     | 0.578   | 0.111     | 4.486    | 0.981                       | 2/13/2012 0:02  | 29.42             |                                             |
| 2012/2/13 3:00              | 1.6848     | 33.6148  | 0.321     | 0.397   | 0.112     | 3.486    | 0.718                       | 2/13/2012 3:01  | 27.13             |                                             |
| 2012/2/13 6:00              | 1.3632     | 33.6365  | 0.335     | 0.405   | 0.090     | 3.662    | 0.740                       | 2/13/2012 6:04  | 24.37             |                                             |
